# Supplementary material
Source: publisher figshare collection journal article supplement (https://sage.figshare.com/ndownloader/files/15288647)
Supplement: Supplementary file 1 [file 15288647]

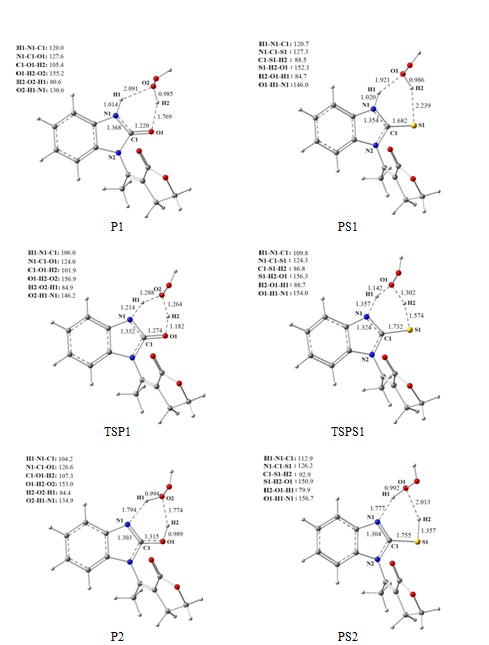


**Figure S1.** Optimized geometries involved in hydrogen peroxide assisted tautomerisation reactions.


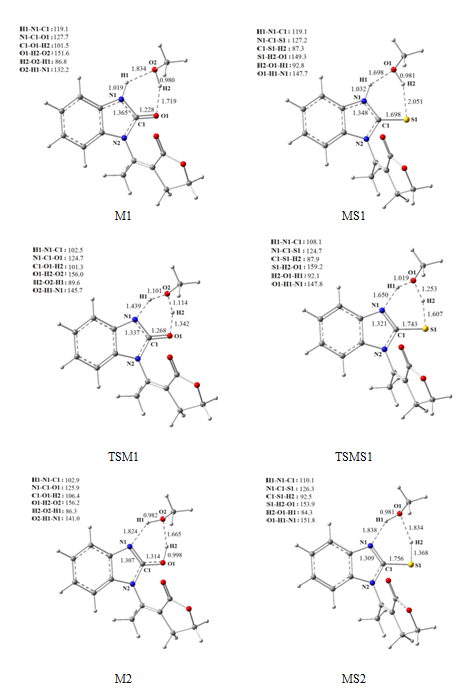


**Figure S2.** Optimized geometries involved in methanol assisted tautomerization reaction.
